# Supplementary material for: In Vitro Assessment of the Prebiotic Potential of Xylooligosaccharides from Barley Straw
Source: MDPI journal article supplement (doi:10.3390/foods12010083), 2022-12-23
Supplement: s1 [file s1]

## Supporting Information

*In vitro* assessment of the prebiotic potential of xylooligosaccharides from barley straw

Cristina Álvarez<sup>a\*</sup>, Alberto González<sup>a</sup>, Ignacio Ballesteros<sup>a</sup>, Beatriz Gullón<sup>b</sup>, María José Negro<sup>a</sup>

<sup>a</sup>Advanced Biofuels and Bioproducts Unit, Energy Department-CIEMAT, 28040-Madrid, Spain

<sup>b</sup>Department of Chemical Engineering, Faculty of Science, University of Vigo (Campus Ourense), As Lagoas, 32004 Ourense, Spain

Corresponding author: [cristina.alvarez@ciemat.es](mailto:cristina.alvarez@ciemat.es)

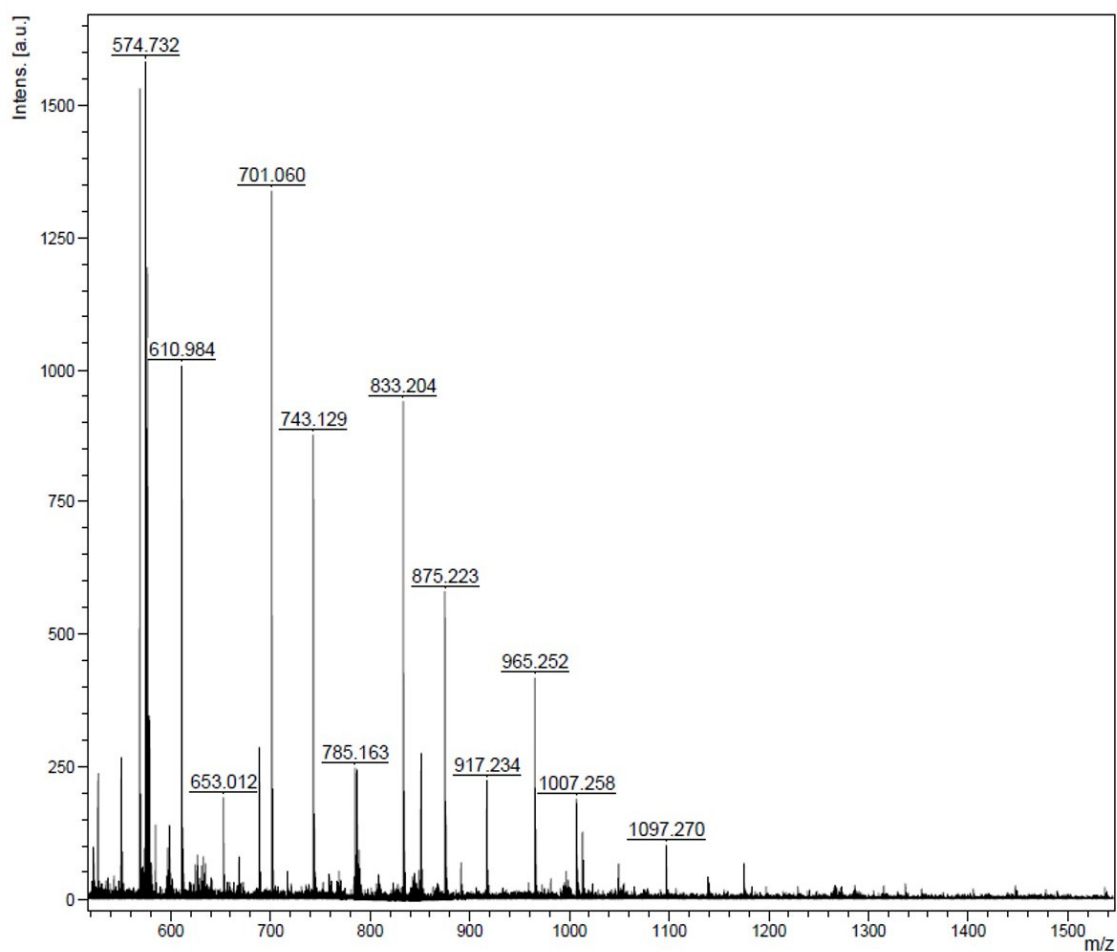

Figure S1: Spectrum MALDI-TOF-MS for F2 compounds
